# Supplementary material for: Experimental determination of the force of malaria infection reveals a non-linear relationship to mosquito sporozoite loads
Source: PubMed Central journal article supplement (PMC7295235; doi:10.1371/journal.ppat.1008181), 2020-05-26

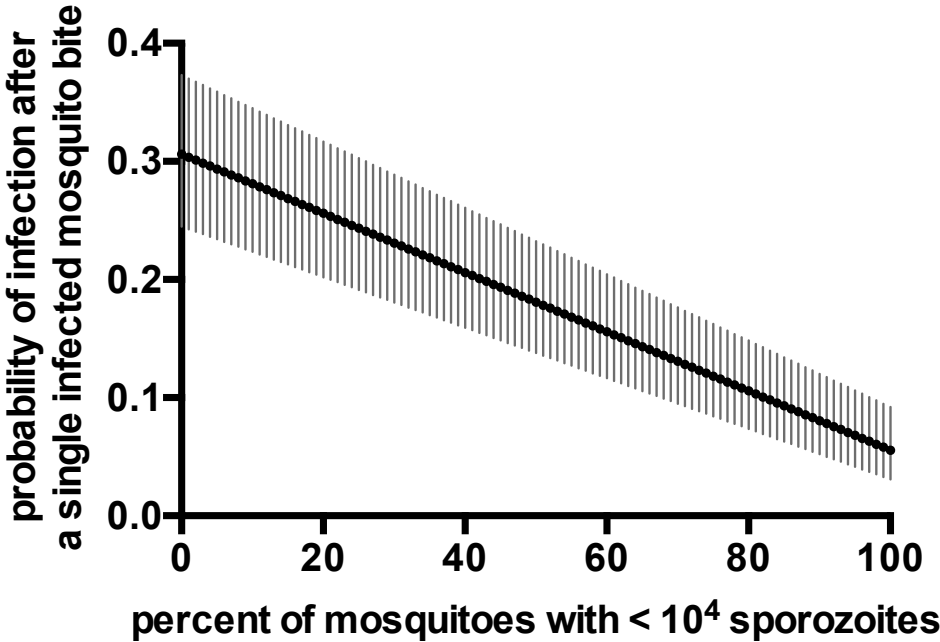

Supplement: ppat.1008181.s005.pdf [file ppat.1008181.s005.pdf]
